# Supplementary material for: Towards a More Efficient In and Ex Situ Conservation of Sri Lankan Wild Rice Species
Source: MDPI journal article supplement (doi:10.3390/plants12112149), 2023-05-29
Supplement: s1 [file s1]

**Table S1.** Number of seed accessions from IRRI, PGRC.

| Species             | IRRI | PGRC |
|---------------------|------|------|
| <i>O.nivara</i>     | 29   | 24   |
| <i>O.rhizomatis</i> | 20   | 23   |
| <i>O.rufipogon</i>  | 11   | 07   |
| <i>O.eichengeri</i> | 10   | 09   |
| <i>O.granulata</i>  | 02   | 02   |
| Total               | 72   | 65   |

IRRI – International Rice Research Institute, PGRC-Plant Genetic Resource Center.

**Table S2.** Status of *in-situ* and *ex-situ* conservation of Sri Lankan wild rice species.

| Species             | Number of Literature locations | Number of confirmed locations | Number of locations that fall within protected areas | Effective/ineffective <i>in-situ</i> protection | Number of <i>ex-situ</i> seed accessions | IUCN category in Sri Lanka (IUCN Sri Lanka, 2021) |
|---------------------|--------------------------------|-------------------------------|------------------------------------------------------|-------------------------------------------------|------------------------------------------|---------------------------------------------------|
| <i>O.nivara</i>     | 65                             | 13                            | 13                                                   | Effective                                       | 29                                       | NT                                                |
| <i>O.rhizomatis</i> | 46                             | 26                            | 07                                                   | ineffective                                     | 20                                       | VU                                                |
| <i>O.rufipogon</i>  | 29                             | 8                             | 00                                                   | ineffective                                     | 11                                       | NT                                                |
| <i>O.eichengeri</i> | 12                             | 3                             | 10                                                   | ineffective                                     | 10                                       | LC                                                |
| <i>O.granulata</i>  | 14                             | 3                             | 02                                                   | Effective                                       | 02                                       | NE                                                |

NT- Near Threatened, VU- Vulnerable, LC-Least Concerned, NE- Not Evaluated.

**Table S3.** Details of locations, reference, presence/ absence of population during field survey and presence of population in/outside the protected area of Sri Lankan wild rice species.

| Species         | District     | Location | Latitude | Longitude | Data source | Reference            | Note | Protected areas |
|-----------------|--------------|----------|----------|-----------|-------------|----------------------|------|-----------------|
| <i>O.nivara</i> | Monaragala   |          | 6.4109   | 81.3293   | Literature  | Liyanage et al.,2010 | -    |                 |
| <i>O.nivara</i> | Anuradhapura |          | 8.3108   | 80.3321   | Literature  | Liyanage et al.,2010 | -    | √               |

|                 |               |                                      |        |         |            |                      |                                |   |
|-----------------|---------------|--------------------------------------|--------|---------|------------|----------------------|--------------------------------|---|
| <i>O.nivara</i> | Anuradha pura |                                      | 8.3768 | 80.0758 | Literature | Liyanage et al.,2010 | -                              | √ |
| <i>O.nivara</i> | Ampara        | Lahugala, Kitulana N.P – Pottuvil rd | 6.8896 | 81.7217 | Literature | Liyanage et al.,2010 | -                              | X |
| <i>O.nivara</i> | Hambantota    | Yala, Gonagala wawa, YNP             | 6.3349 | 81.4519 | Literature | Liyanage et al.,2010 | -                              | √ |
| <i>O.nivara</i> | Hambantota    | Gonagala wawa, YNP                   | 6.3333 | 81.45   | Literature | Liyanage et al.,2010 | -                              | √ |
| <i>O.nivara</i> | Hambantota    | Buthawa junction, YNP                | 6.3184 | 81.4823 | Literature | Liyanage et al.,2010 | Field survey in 2022 - Present | √ |
| <i>O.nivara</i> | Hambantota    | Uraniya Wewa, YNP                    | 6.3256 | 81.476  | Literature | Liyanage et al.,2010 | Field survey in 2022- Present  | √ |
| <i>O.nivara</i> | Hambantota    | Buthawa,Y NP                         | 6.3274 | 81.4751 | Literature | Liyanage et al.,2010 | Field survey in 2022 - Present | √ |
| <i>O.nivara</i> | Hambantota    | Uththawapitiya, YNP                  | 6.3248 | 81.4768 | Literature | Liyanage et al.,2010 | Field survey in 2022 - Present | √ |
| <i>O.nivara</i> | Hambantota    | Vilapalawa Wewa, YNP                 | 6.3049 | 81.4416 | Literature | Liyanage et al.,2010 | -                              | √ |
| <i>O.nivara</i> | Hambantota    | Sithulpauw a rd, YNP                 | 6.2964 | 81.4107 | Literature | Liyanage et al.,2010 | -                              | √ |
| <i>O.nivara</i> | Kurunagale    | Tennawewa, Katupotha, Kurunagala     | 7.5883 | 80.0583 | Literature | Liyanage et al.,2010 | Field survey 2021 - Extinct    | X |

|                 |              |                             |        |         |            |                      |                                |   |
|-----------------|--------------|-----------------------------|--------|---------|------------|----------------------|--------------------------------|---|
| <i>O.nivara</i> | Kurunagale   | Yakadapotha wewa            | 7.7    | 80.1333 | Literature | Liyanage et al.,2010 | Field survey in 2022 - Present | X |
| <i>O.nivara</i> | Kurunagale   | Avulegama ,<br>Nikawaratiya | 7.68   | 80.2    | Literature | Liyanage et al.,2010 | Field survey in 2022 - Present | X |
| <i>O.nivara</i> | Anuradhapura | Thirappane                  | 8.2269 | 80.5223 | Literature | Liyanage et al.,2010 | -                              | X |
| <i>O.nivara</i> | Anuradhapura | Madaradan kadawala          | 8.55   | 80.85   | Literature | Liyanage et al.,2010 | -                              | X |
| <i>O.nivara</i> | Matale       | Habarana                    | 8.0133 | 80.7428 | Literature | Liyanage et al.,2010 | -                              | X |
| <i>O.nivara</i> | Puttalam     | Madampe                     | 7.4754 | 79.8293 | Literature | Liyanage et al.,2010 | -                              | X |
| <i>O.nivara</i> | Kurunagale   | Wariyapola                  | 7.6753 | 80.232  | Literature | Liyanage et al.,2010 | -                              | X |
| <i>O.nivara</i> | Kurunagale   | Galgamuwa                   | 7.6757 | 80.2321 | Literature | Liyanage et al.,2010 | -                              | X |
| <i>O.nivara</i> | Kurunagale   | Thamitawe wa                | 7.6342 | 80.4391 | Literature | Liyanage et al.,2010 |                                | X |
| <i>O.nivara</i> | Kurunagale   | Mahakeliya                  | 7.6124 | 80.2714 | Literature | Liyanage et al.,2010 | -                              | X |
| <i>O.nivara</i> | Badulla      | Mahiyangana                 | 7.3353 | 80.9932 | Literature | Liyanage et al.,2010 | -                              | X |
| <i>O.nivara</i> | Monaragala   | Bibila                      | 7.1771 | 81.1968 | Literature | Liyanage et al.,2010 | Field survey in 2022- Extinct  | X |
| <i>O.nivara</i> | Monaragala   | Kotaweheragala              | 6.4666 | 81.4666 | Literature | Liyanage et al.,2010 | -                              | √ |
| <i>O.nivara</i> | Matale       | Makulugas wewa              | 7.8441 | 80.579  | Literature | Liyanage et al.,2010 | Field survey in 2022- Extinct  | X |
| <i>O.nivara</i> | Anuradhapura | Palbadiyawa                 | 7.8892 | 80.5361 | Literature | Liyanage et al.,2010 | -                              | X |

|                 |              |                         |        |         |            |                      |                                |   |
|-----------------|--------------|-------------------------|--------|---------|------------|----------------------|--------------------------------|---|
| <i>O.nivara</i> | Kurunagale   | Negama                  | 7.9688 | 80.3434 | Literature | Liyanage et al.,2010 | Field survey in 2022- Extinct  | X |
| <i>O.nivara</i> | Kurunagale   | Mahahttapahuwa          | 8.0095 | 80.4057 | Literature | Liyanage et al.,2010 | Field survey in 2022 - Present | X |
| <i>O.nivara</i> | Anuradhapura | Illukulama              | 8.3104 | 80.3323 | Literature | Liyanage et al.,2010 | -                              | X |
| <i>O.nivara</i> | Anuradhapura | Mihintale               | 8.3632 | 80.5292 | Literature | Liyanage et al.,2010 | -                              | X |
| <i>O.nivara</i> | Anuradhapura | Wagollakada             | 8.6612 | 80.8686 | Literature | Liyanage et al.,2010 | -                              | X |
| <i>O.nivara</i> | Anuradhapura | Morakewa, Maichchawa    | 8.4868 | 80.7553 | Literature | Liyanage et al.,2010 | -                              | X |
| <i>O.nivara</i> | Anuradhapura | Mankadawala, Saliyapura | 8.399  | 80.4488 | Literature | Liyanage et al.,2010 | -                              | X |
| <i>O.nivara</i> | Anuradhapura | Mankadawala             | 8.4044 | 80.4488 | Literature | Liyanage et al.,2010 | Field survey in 2021 - Extinct | X |
| <i>O.nivara</i> | Anuradhapura | Punewe                  | 8.6108 | 80.4709 | Literature | Liyanage et al.,2010 | -                              | X |
| <i>O.nivara</i> | Anuradhapura | Galkandegama            | 8.6653 | 80.4765 | Literature | Liyanage et al.,2010 | -                              | X |
| <i>O.nivara</i> | Polonnaruwa  | Galviharaya             | 7.9647 | 81.0038 | Literature | Liyanage et al.,2010 | -                              | √ |
| <i>O.nivara</i> | Matale       | Sigiriya                | 7.9526 | 80.7593 | Literature | Liyanage et al.,2010 | Field survey in 2021 - Extinct | X |
| <i>O.nivara</i> | Matale       | Sigiriya                | 7.9464 | 80.7384 | Literature | Liyanage et al.,2010 | -                              | X |
| <i>O.nivara</i> | Matale       | Dambulla                | 7.8582 | 80.6593 | Literature | Liyanage et al.,2010 | -                              | X |

|                 |                  |                                     |        |         |                |                         |                                     |   |
|-----------------|------------------|-------------------------------------|--------|---------|----------------|-------------------------|-------------------------------------|---|
| <i>O.nivara</i> | Hambanto<br>ta   | Jamburagal<br>a, YNP                | 6.3035 | 81.4254 | Literatu<br>re | Liyanage et<br>al.,2010 | -                                   | √ |
| <i>O.nivara</i> | Hambanto<br>ta   | Jamburagal<br>a, YNP                | 6.3079 | 81.4231 | Literatu<br>re | Liyanage et<br>al.,2010 | -                                   | √ |
| <i>O.nivara</i> | Hambanto<br>ta   | Jamburagal<br>a, YNP                | 6.3165 | 81.4256 | Literatu<br>re | Liyanage et<br>al.,2010 | -                                   | √ |
| <i>O.nivara</i> | Hambanto<br>ta   | Jamburagal<br>a, YNP                | 6.3182 | 81.4268 | Literatu<br>re | Liyanage et<br>al.,2010 | -                                   | √ |
| <i>O.nivara</i> | Hambanto<br>ta   | Jamburagal<br>a, YNP                | 6.3179 | 81.4263 | Literatu<br>re | Liyanage et<br>al.,2010 | -                                   | √ |
| <i>O.nivara</i> | Hambanto<br>ta   | Unawa,<br>YNP                       | 6.3299 | 81.44   | Literatu<br>re | Liyanage et<br>al.,2010 | -                                   | √ |
| <i>O.nivara</i> | Hambanto<br>ta   | Mahasilaw<br>a wewa,<br>YNP         | 6.2919 | 81.4339 | Literatu<br>re | Liyanage et<br>al.,2010 | -                                   | √ |
| <i>O.nivara</i> | Hambanto<br>ta   | Uraniya rd,<br>YNP                  | 6.308  | 81.448  | Literatu<br>re | Liyanage et<br>al.,2010 | -                                   | √ |
| <i>O.nivara</i> | Hambanto<br>ta   | Palugaswal<br>a, YNP                | 6.3182 | 81.477  | Literatu<br>re | Liyanage et<br>al.,2010 | -                                   | √ |
| <i>O.nivara</i> | Hambanto<br>ta   | Near<br>Karuwalag<br>aswala,<br>YNP | 6.3249 | 81.4728 | Literatu<br>re | Liyanage et<br>al.,2010 | -                                   | √ |
| <i>O.nivara</i> | Hambanto<br>ta   | Butthawala<br>, YNP                 | 6.3324 | 81.4743 | Literatu<br>re | Liyanage et<br>al.,2010 | -                                   | √ |
| <i>O.nivara</i> | Hambanto<br>ta   | Rakinawal<br>a, YNP                 | 6.3602 | 81.5066 | Literatu<br>re | Liyanage et<br>al.,2010 | -                                   | √ |
| <i>O.nivara</i> | Hambanto<br>ta   | Hadunoru<br>wa wewa,<br>YNP         | 6.1666 | 80.9116 | Literatu<br>re | Liyanage et<br>al.,2010 | Field survey<br>in 2022-<br>Extinct | √ |
| <i>O.nivara</i> | Hambanto<br>ta   | Suduwelim<br>ulla, YNP              | 6.3631 | 81.5138 | Literatu<br>re | Liyanage et<br>al.,2010 | -                                   | √ |
| <i>O.nivara</i> | Anuradha<br>pura | Habarana                            | 8.0559 | 80.722  | Literatu<br>re | Liyanage et<br>al.,2010 | -                                   | X |

|                 |                  |                       |          |                 |                |                         |                                                |   |
|-----------------|------------------|-----------------------|----------|-----------------|----------------|-------------------------|------------------------------------------------|---|
| <i>O.nivara</i> | Anuradha<br>pura | Habarana              | 8.089    | 80.6627         | Literatu<br>re | Liyanage et<br>al.,2010 | -                                              | X |
| <i>O.nivara</i> | Anuradha<br>pura | Thirappane            | 8.2458   | 80.5215         | Literatu<br>re | Liyanage et<br>al.,2010 | -                                              | X |
| <i>O.nivara</i> | Monaraga<br>la   | Kotiyagala            | 6.7795   | 81.5377         | Literatu<br>re | Liyanage et<br>al.,2010 | -                                              | √ |
| <i>O.nivara</i> | Hambanto<br>ta   | Patalangala           | 6.3581   | 81.504          | Literatu<br>re | Liyanage et<br>al.,2010 | Field survey<br>in 2022 -<br>Present           | √ |
| <i>O.nivara</i> | Badulla          | Thalguspiti<br>ya     | 7.29     | 81.0208         | Literatu<br>re | Liyanage et<br>al.,2010 | -                                              | X |
| <i>O.nivara</i> | Hambanto<br>ta   | Gonagalapi<br>tiya    | 6.3468   | 81.4453         | Literatu<br>re | Liyanage et<br>al.,2010 | -                                              | √ |
| <i>O.nivara</i> | Badulla          | Udaya Raja<br>Mawatha | 6.9861   | 81.0576<br>6    | Literatu<br>re | Liyanage et<br>al.,2010 | Field surey<br>in 2022 -<br>Extinct            |   |
| <i>O.nivara</i> | Kurunagal<br>e   | Kolamunna<br>wewa     | 7.5618   | 80.1902         | Literatu<br>re | Liyanage et<br>al.,2010 | -                                              | X |
| <i>O.nivara</i> | Kurunagal<br>e   | Dematawe<br>wa        | 7.9869   | 80.3165         | Literatu<br>re | Liyanage et<br>al.,2010 | -                                              | X |
| <i>O.nivara</i> | Anuradha<br>pura | Mihintale             | 8.3546   | 80.4712         | Literatu<br>re | Liyanage et<br>al.,2010 | -                                              | X |
| <i>O.nivara</i> | Anuradha<br>pura | Mawathaw<br>ewa       | 8.2833   | 80.2            | Literatu<br>re | Liyanage et<br>al.,2010 | -                                              | X |
| <i>O.nivara</i> | Anuradha<br>pura | Ambagusw<br>ewa       | 8.6073   | 80.8391         | Literatu<br>re | Liyanage et<br>al.,2010 | -                                              | X |
| <i>O.nivara</i> | Anuradha<br>pura | Negama                | 7.9823   | 80.4779         | Literatu<br>re | Liyanage et<br>al.,2010 | -                                              | X |
| <i>O.nivara</i> | Jaffna           | Chavakach<br>cheri    | 9.672722 | 80.1651<br>9    | Literatu<br>re |                         | Field survey<br>in 2021 –<br>New<br>population | X |
| <i>O.nivara</i> | Jaffna           | Thanankila<br>ppu     | 9.63425  | 80.1490<br>8333 | Literatu<br>re | -                       | Field survey<br>in 2021 –                      | X |

|                     |          |               |          |           |            |                      |                                       |   |
|---------------------|----------|---------------|----------|-----------|------------|----------------------|---------------------------------------|---|
|                     |          |               |          |           |            |                      | New population                        |   |
| <i>O.nivara</i>     | Jaffna   | Manduvil      | 9.675222 | 80.17836  | Literature | -                    | Field survey in 2021 – New population | X |
| <i>O.nivara</i>     | Jaffna   | Kalvayal      | 9.668995 | 80.162466 | Literature | -                    | Field survey in 2021 – New population | X |
| <i>O.nivara</i>     | Jaffna   | Kopay South   | 9.69885  | 80.063319 | Literature | -                    | Field survey in 2021 – New population | X |
| <i>O.rhizomatis</i> | Puttalam | Eluwankulam   | 8.086389 | 79.84528  | Literature | Liyanage et al.,2010 | Field survey in 2021 – Present        | X |
| <i>O.rhizomatis</i> | Puttalam | Madurankuliya | 7.876111 | 79.81583  | Literature | Liyanage et al.,2010 | Field survey in 2021 – Present        | X |
| <i>O.rhizomatis</i> | Puttalam | Welpittaniya  | 8.266389 | 79.89056  | Literature | Liyanage et al.,2010 | Field survey in 2021 – Present        | X |
| <i>O.rhizomatis</i> | Puttalam | Tabbowa       | 8.055278 | 79.927500 | Literature | Liyanage et al.,2010 | Field survey in 2021 – Present        | X |
| <i>O.rhizomatis</i> | Puttalam | Sella Kandal  | 8.044111 | 79.918    | Literature | Liyanage et al.,2010 | Field survey in 2021 – Present        | X |
| <i>O.rhizomatis</i> | Puttalam | Sella kandal  | 8.046694 | 79.926    | Literature | Liyanage et al.,2010 | Field survey in 2021 – Present        | X |
| <i>O.rhizomatis</i> | Puttalam | Vattakandal   | 8.118194 | 79.856    | Literature | Liyanage et al.,2010 | Field survey in 2021 – Present        | X |

|                     |              |                        |          |          |            |                                        |                                |   |
|---------------------|--------------|------------------------|----------|----------|------------|----------------------------------------|--------------------------------|---|
| <i>O.rhizomatis</i> | Puttalam     | Kaladiya               | 7.982889 | 79.907   | Literature | Liyanage et al.,2010                   | Field survey in 2021 – Present | X |
| <i>O.rhizomatis</i> | Anuradhapura | Oyamaduwa              | 8.442306 | 80.279   | Literature | Liyanage et al.,2010                   | Field survey in 2021 – Present | X |
| <i>O.rhizomatis</i> | Anuradhapura | Medinnoruwa, Meegalewa | 8.054111 | 80.364   | Literature | Liyanage et al.,2010                   | Field survey in 2021 – Present | X |
| <i>O.rhizomatis</i> | Monaragale   | Sella Kataragama       | 6.461611 | 81.31081 | Literature | Liyanage et al.,2010                   | Field survey in 2021 – Present | √ |
| <i>O.rhizomatis</i> | Monaragale   | Sella Kataragama       | 6.443194 | 81.30981 | Literature | Liyanage et al.,2010                   | Field survey in 2021 – Present | X |
| <i>O.rhizomatis</i> | Monaragale   | Sella Kataragama       | 6.411    | 81.34369 | Literature | Liyanage et al.,2010                   | Field survey in 2021 – Present | √ |
| <i>O.rhizomatis</i> | Monaragale   | Sella Kataragama       | 6.578    | 81.27981 | Literature | Liyanage et al.,2010                   | Field survey in 2021 – Present | √ |
| <i>O.rhizomatis</i> | Hambantota   | Andaragasyaya          | 6.22     | 81.31    | Literature | Liyanage et al.,2010                   | Field survey in 2021 – Present | √ |
| <i>O.rhizomatis</i> | Hambantota   | Kirinda                | 6.3585   | 81.5     | Literature | Liyanage et al.,2010                   | Field survey in 2021 – Present | √ |
| <i>O.rhizomatis</i> | Hambantota   | Manicganga, YNP        | 6.3708   | 81.5186  | Literature | Liyanage et al.,2010                   | Field survey in 2021 – Present | √ |
| <i>O.rhizomatis</i> | Hambantota   | Yala wewa, YNP         | 6.3637   | 81.5141  | Literature | Liyanage et al.,2010                   | Field survey in 2021 – Present | √ |
| <i>O.rhizomatis</i> | Puttalam     | Karikattiya            | 7.948806 | 79.828   | literature | Liyanage A.S.U and Senanayake G., 2017 | -                              | X |



|                     |              |                                |          |          |            |                                        |                                |   |
|---------------------|--------------|--------------------------------|----------|----------|------------|----------------------------------------|--------------------------------|---|
| <i>O.rhizomatis</i> | Puttalam     | Nikaweratiya                   | 7.703889 | 80.16417 | literature | Ratnayake et al.,2021                  | -                              | X |
| <i>O.rhizomatis</i> | Puttalam     | Pawattama duwa                 | 8.073806 | 79.91069 | literature | Ratnayake et al.,2021                  | -                              | X |
| <i>O.rhizomatis</i> | Anuradhapura | Ganewalpo la                   | 8.095    | 80.61111 | literature | Liyanage et al., 2002                  | -                              | X |
| <i>O.rhizomatis</i> | Anuradhapura | Maha Bulankulama               | 8.305556 | 80.31889 | literature | Liyanage et al., 2002                  | -                              | X |
| <i>O.rhizomatis</i> | Anuradhapura | Rajanganaya                    | 8.227306 | 80.0885  | literature | Liyanage A.S.U and Senanayake G., 2017 | Field survey in 2021 – Extinct | X |
| <i>O.rhizomatis</i> | Anuradhapura | Nochchiyagama                  | 8.326306 | 80.13761 | literature | Ratnayake et al.,2021                  | Field survey in 2021 – Present | X |
| <i>O.rhizomatis</i> | Anuradhapura | Sangilikana darawa Wewa        | 8.527306 | 80.52731 | literature | Ratnayake et al.,2021                  | Field survey in 2021 – Extinct | X |
| <i>O.rhizomatis</i> | Anuradhapura | Andarawe wa                    | 8.279306 | 80.26431 | literature | Ratnayake et al.,2021                  | Field survey in 2021 – Present | X |
| <i>O.rhizomatis</i> | Kurunagale   | Nikaweratiya                   | 7.703889 | 80.16417 | Literature | Liyanage et al., 2002                  | Field survey in 2021 – Extinct | X |
| <i>O.rhizomatis</i> | Kurunagale   | Medinnoruwa, Meegalewa         | 8.054111 | 80.364   | Literature | Ratnayake et al.,2021                  | Field survey in 2021 – Present | X |
| <i>O.rhizomatis</i> | Kurunagale   | Walaswewa                      | 8.030611 | 80.319   | Literature | Ratnayake et al.,2021                  | Field survey in 2021 – Extinct | X |
| <i>O.rhizomatis</i> | Ampara       | Perani Lahugala                | 6.888694 | 81.6945  | literature | Ratnayake et al.,2021                  | -                              | X |
| <i>O.rhizomatis</i> | Hambantota   | Colombo - Galle - Hambantota - | 6.483    | 81.13081 | Literature | Ratnayake et al.,2021                  | -                              | X |

|                      |           |                                                          |        |         |            |                      |                                |   |
|----------------------|-----------|----------------------------------------------------------|--------|---------|------------|----------------------|--------------------------------|---|
|                      |           | Wellawaya Rd                                             |        |         |            |                      |                                |   |
| <i>O. eichingeri</i> | Matale    | Archeoogical site, Manikdena, Lenadora, Dambulla         | 7.7646 | 80.6399 | Literature | Liyanage et al.,2010 |                                | X |
| <i>O. eichingeri</i> | Ratnapura | Water canal, before Waulpane school, Waulpane, Ratnapura | 6.4317 | 80.7281 | Literature | Liyanage et al.,2010 | Field survey in 2021 – Present | X |
| <i>O. eichingeri</i> | Ratnapura | Waulpane, Ratnapura                                      | 6.4281 | 80.7309 | Literature | Liyanage et al.,2010 | Field survey in 2021 – Present | X |
| <i>O.eichingeri</i>  | Matale    | Watapitiya, Wasgamuwa National park                      | 7.6636 | 80.9989 | Literature | Liyanage et al.,2010 | -                              | X |
| <i>O.eichengeri</i>  | Matale    | Karpincha ela, Wasgamuwa National ark                    | 7.6636 | 80.9989 | Literature | Liyanage et al.,2010 | -                              | X |
| <i>O.eichengeri</i>  | Matale    | Medapitiya, wasgamuwa National park                      | 7.6716 | 80.9271 | Literature | Liyanage et al.,2010 | -                              | √ |
| <i>O.eichengeri</i>  | Matale    | Mukkura kanda, Wasgamuwa National park                   | 7.6835 | 80.9009 | Literature | Liyanage et al.,2010 | -                              | √ |

|                     |              |                                                       |        |         |            |                      |                                |   |
|---------------------|--------------|-------------------------------------------------------|--------|---------|------------|----------------------|--------------------------------|---|
| <i>O.eichengeri</i> | Matale       | Ulpath Hatha camp site, Wasgamuwa National Park       | 7.6816 | 80.8975 | Literature | Liyanage et al.,2010 | -                              | √ |
| <i>O.eichengeri</i> | Kandy        | Telwela, Heen Ganga Anicut, Road to Dungolla          | 7.4629 | 80.9469 | Literature | Liyanage et al.,2010 | -                              | X |
| <i>O.eichengeri</i> | Polonnaruwa  | Unapitiya, Minneriya National Park, Polonnaruwa       | 8.0222 | 80.8384 | Literature | Liyanage et al.,2010 | -                              | X |
| <i>O.eichengeri</i> | Polonnaruwa  | Akkara 100 para, Minneriya National park, Polonnaruwa | 8.0323 | 80.8335 | Literature | Liyanage et al.,2010 |                                | X |
| <i>O.eichengeri</i> | Ratnapura    | Rajawaka, Balangoda Thanamali wila rd                 | 6.6079 | 80.7932 | Literature | Liyanage et al.,2010 | Field survey in 2021 - Present | X |
| <i>O.eichengeri</i> | Anuradhapura | Bonji temple,Mihintale Mahiyangana                    | 8.3459 | 80.5058 | Literature | Liyanage et al.,2010 | -                              | X |
| <i>O.eichengeri</i> | Matale       | Thelwala, Heen ganga,                                 | 7.9257 | 80.9977 | Literature | Liyanage et al.,2010 | -                              | X |

|                     |              |                                                  |        |         |            |                      |                                |   |
|---------------------|--------------|--------------------------------------------------|--------|---------|------------|----------------------|--------------------------------|---|
|                     |              | wilgamuwa                                        |        |         |            |                      |                                |   |
| <i>O.eichengeri</i> | Anuradhapura | Ritigala                                         | 8.1176 | 80.5813 | Literature | Liyanage et al.,2010 | -                              | X |
| <i>O.eichengeri</i> | Matale       | Archeoogical site, Manikdena, Lenadora, Dambulla | 7.7674 | 80.6074 | Literature | Liyanage et al.,2010 | -                              | X |
| <i>O.eichengeri</i> | Polonnaruwa  | Hatharas kotuwa, Galoyahandiya                   | 8.1464 | 80.8449 | Literature | Liyanage et al.,2010 | -                              | X |
| <i>O.eichengeri</i> | Monaragala   | Makara rd, Galoya National Park                  | 7.1911 | 81.4223 | Literature | Liyanage et al.,2010 | -                              | √ |
| <i>O.eichengeri</i> | Monaragala   | Seenukkanda, Galoya national Park                | 7.1885 | 81.3784 | Literature | Liyanage et al.,2010 | -                              | √ |
| <i>O.granulata</i>  | Monaragale   | Wellawaya                                        | 6.7281 | 81.084  | Literature | Liyanage et al.,2010 | -                              | X |
| <i>O.granulata</i>  | Ratnapura    | Kapugala                                         | 6.5825 | 80.7989 | Literature | Liyanage et al.,2010 | Field survey in 2021 - Present | X |
| <i>O.granulata</i>  | Matale       | Sigiriya                                         | 7.9505 | 80.7744 | Literature | Liyanage et al.,2010 | -                              | X |
| <i>O.granulata</i>  | Matale       | Sigiriya                                         | 7.9498 | 80.779  | Literature | Liyanage et al.,2010 | -                              | X |
| <i>O.granulata</i>  | Ratnapura    | Waulpane                                         | 6.4215 | 80.733  | Literature | Liyanage et al.,2010 | Field survey in 2021 - Present | X |
| <i>O.granulata</i>  | Ratnapura    | Waulpane                                         | 6.4333 | 80.7333 | Literature | Liyanage et al.,2010 | Field survey in 2021 - Present | X |

|                    |                |                    |               |                |                |                         |                                      |   |
|--------------------|----------------|--------------------|---------------|----------------|----------------|-------------------------|--------------------------------------|---|
| <i>O.granulata</i> | Ratnapura      | Waulpane           | 6.4166        | 80.7166        | Literatu<br>re | Liyanage et<br>al.,2010 | Field survey<br>in 2021 -<br>Present | X |
| <i>O.granulata</i> | Monaraga<br>la | Wellawaya          | 6.7281        | 81.0849        | Literatu<br>re | Liyanage et<br>al.,2010 | -                                    | X |
| <i>O.granulata</i> | Badulla        | Beragala           | 6.716         | 81.0669        | Literatu<br>re | Liyanage et<br>al.,2010 | -                                    | X |
| <i>O.granulata</i> | Ratnapura      | Daminakati<br>ya   | 6.4015        | 80.7216        | Literatu<br>re | Liyanage et<br>al.,2010 | -                                    | X |
| <i>O.granulata</i> | Ratnapura      | Ellepahala         | 6.4019        | 80.7216        | Literatu<br>re | Liyanage et<br>al.,2010 | -                                    | X |
| <i>O.granulata</i> | Monaraga<br>la | Bergala            | 6.7333        | 81.1           | Literatu<br>re | Liyanage et<br>al.,2010 | -                                    | X |
| <i>O.rufipogon</i> | Kalutara       | Bandaraga<br>ma    | 6.7095        | 79.9787<br>5   | Literatu<br>re | Liyanage et<br>al.,2010 | Field survey<br>in 2021 -<br>Present | X |
| <i>O.rufipogon</i> | Kalutara       | Moronthud<br>uwa   | 6.635583<br>3 | 79.9509<br>166 | Literatu<br>re | Liyanage et<br>al.,2010 | Field survey<br>in 2021 -<br>Present | X |
| <i>O.rufipogon</i> | Kalutara       | Wadduwa            | 6.666583<br>3 | 79.9606<br>11  | Literatu<br>re | Liyanage et<br>al.,2010 | Field survey<br>in 2021 -<br>Present | X |
| <i>O.rufipogon</i> | Kalutara       | Palpola            | 6.635916<br>7 | 80.0106<br>6   | Literatu<br>re | Liyanage et<br>al.,2010 | Field survey<br>in 2021 -<br>Present | X |
| <i>O.rufipogon</i> | Kalutara       | Delkada<br>Pelpola | 6.64644       | 79.9931<br>6   | Literatu<br>re | Liyanage et<br>al.,2010 | Field survey<br>in 2021 -<br>Present | X |
| <i>O.rufipogon</i> | Kalutara       | Morontudu<br>wa    | 6.669916      | 79.9812        | Literatu<br>re | Liyanage et<br>al.,2010 | Field survey<br>in 2021 -<br>Present | X |
| <i>O.rufipogon</i> | Kalutara       | Thoragala          | 6.629083<br>3 | 79.987         | Literatu<br>re | Liyanage et<br>al.,2010 | Field survey<br>in 2021 -<br>Present | X |

|                    |            |                  |           |           |            |                      |                                |   |
|--------------------|------------|------------------|-----------|-----------|------------|----------------------|--------------------------------|---|
| <i>O.rufipogon</i> | Matara     | Palatuwa         | 5.9919167 | 80.519916 | Literature | Liyanage et al.,2010 | Field survey in 2021 - Present | X |
| <i>O.rufipogon</i> | Hambantota | Weeraketiyala    | 6.1551667 | 80.7681   | Literature | Liyanage et al.,2010 | -                              | X |
| <i>O.rufipogon</i> | Kalutara   | Paraduwa         | 6.627777  | 79.9875   | Literature | -                    | Confirmed in 2021              | X |
| <i>O.rufipogon</i> | Kalutara   | Panapitiya South | 6.6277    | 79.9575   | Literature | -                    | Confirmed in 2021              | X |
|                    |            |                  |           |           |            |                      |                                |   |
|                    |            |                  |           |           |            |                      |                                |   |

**Table S4.** Ex situ seed bank data from IRRI.

| Species              | Seed bank | Collection site | Accession number | Acq-date  | Latitude | Longitude |
|----------------------|-----------|-----------------|------------------|-----------|----------|-----------|
| <i>O. eichingeri</i> | IRRI      | Katharagama     | 81803            | 2/28/1992 | 6.416667 | 81.3331   |
| <i>O. eichingeri</i> | IRRI      | Nindapella      | 81804            | 2/28/1992 | 7.611667 | 80.47222  |
| <i>O. eichingeri</i> | IRRI      | Dambulla        | 101442           | 4/27/1964 | 7.876944 | 80.7      |
| <i>O. eichingeri</i> | IRRI      | Godakawela      | 104608           | 3/5/1984  | 6.5      | 80.6667   |
| <i>O. eichingeri</i> | IRRI      | Pallegama       | 105407           | 2/14/1988 | 7.5      | 80.6667   |
| <i>O. eichingeri</i> | IRRI      | Pallegama       | 105408           | 2/14/1988 | 7.5      | 80.6667   |
| <i>O. eichingeri</i> | IRRI      | Mahasengama     | 105412           | 2/14/1988 | 8        | 80.8333   |
| <i>O. eichingeri</i> | IRRI      | Unagollewa Wewa | 105413           | 2/14/1988 | 8.166667 | 80.6667   |
| <i>O. eichingeri</i> | IRRI      | Unagollewa Wewa | 105414           | 2/14/1988 | 8.166667 | 80.6667   |

|                      |      |                  |        |           |          |         |
|----------------------|------|------------------|--------|-----------|----------|---------|
| <i>O. eichingeri</i> | IRRI | Unagollewa Wewa  | 105415 | 2/14/1988 | 8.166667 | 80.6667 |
| <i>O.granulata</i>   | IRRI | Bandaragama      | 100880 | 1/27/1963 | 6.716667 | 79.9833 |
| <i>O.granulata</i>   | IRRI | Dambulla         | 104611 | 3/5/1984  | 8        | 80.6667 |
| <i>O. nivara</i>     | IRRI | Thihilivaddai    | 101994 | 6/8/1972  | 7.833333 | 81.5208 |
| <i>O. nivara</i>     | IRRI | Dambulla         | 103407 | 2/1/1978  | 7.876944 | 80.7    |
| <i>O. nivara</i>     | IRRI | Paranahalmillewa | 103415 | 2/26/1979 | 8.65     | 80.5    |
| <i>O. nivara</i>     | IRRI | Alagalla         | 103416 | 2/26/1979 | 8.666667 | 80.5    |
| <i>O. nivara</i>     | IRRI | Vavuniya         | 103418 | 2/26/1979 | 8.666667 | 80.4167 |
| <i>O. nivara</i>     | IRRI | -                | 103419 | 2/26/1979 | 9.666667 | 80.4167 |
| <i>O. nivara</i>     | IRRI | Odavi Kulam      | 103420 | 2/26/1979 | 8.916667 | 81      |
| <i>O. nivara</i>     | IRRI | Odavi Kulam      | 103422 | 2/26/1979 | 8.916667 | 81      |
| <i>O. nivara</i>     | IRRI | Dunumadalawa     | 104612 | 3/5/1984  | 7.946944 | 80.6258 |
| <i>O. nivara</i>     | IRRI | Mahasengama      | 105409 | 2/14/1988 | 8        | 80.8333 |
| <i>O. nivara</i>     | IRRI | Mahasengama      | 105410 | 2/14/1988 | 8        | 80.8333 |
| <i>O. nivara</i>     | IRRI | Tammannawa Wewa  | 105416 | 2/14/1988 | 8.083333 | 80.6667 |
| <i>O. nivara</i>     | IRRI | Tammannawa Wewa  | 105417 | 2/14/1988 | 8.083333 | 80.6667 |
| <i>O. nivara</i>     | IRRI | Vihara Palugama  | 105418 | 2/14/1988 | 8.333333 | 80.3333 |
| <i>O. nivara</i>     | IRRI | Vihara Palugama  | 105419 | 2/14/1988 | 8.333333 | 80.3333 |
| <i>O. nivara</i>     | IRRI | -                | 105428 | 2/14/1988 | 6.166667 | 81.5    |
| <i>O. nivara</i>     | IRRI | -                | 105430 | 2/14/1988 | 6.166667 | 81.5    |
| <i>O. nivara</i>     | IRRI | -                | 105431 | 2/14/1988 | 6.166667 | 81.5    |
| <i>O. nivara</i>     | IRRI | -                | 105433 | 2/14/1988 | 6.166667 | 81.5    |
| <i>O. nivara</i>     | IRRI | -                | 105434 | 2/14/1988 | 6.166667 | 81.5    |
| <i>O. nivara</i>     | IRRI | -                | 105442 | 2/14/1988 | 6.166667 | 81.5    |

|                      |      |                     |        |           |          |         |
|----------------------|------|---------------------|--------|-----------|----------|---------|
| <i>O. nivara</i>     | IRRI | -                   | 105444 | 2/14/1988 | 6.166667 | 81.5    |
| <i>O. nivara</i>     | IRRI | Thampalawela        | 105453 | 2/14/1988 | 7        | 81.3333 |
| <i>O. nivara</i>     | IRRI | Kandakettiya Town   | 105454 | 2/14/1988 | 7.166667 | 81      |
| <i>O. nivara</i>     | IRRI | Kandakettiya Town   | 105455 | 2/14/1988 | 7.166667 | 81      |
| <i>O. nivara</i>     | IRRI | Kandakettiya Town   | 105456 | 2/14/1988 | 7.166667 | 81      |
| <i>O. nivara</i>     | IRRI | Kandakettiya Town   | 105458 | 2/14/1988 | 7.166667 | 81      |
| <i>O. nivara</i>     | IRRI | Puliyankulam        | 105459 | 2/14/1988 | 8        | 81.1667 |
| <i>O. nivara</i>     | IRRI | Kandalama Reservoir | 106188 |           | 7.876944 | 80.7    |
| <i>O. rhizomatis</i> | IRRI | Nindapella          | 86466  | 2/28/1992 | 7.611667 | 80.4722 |
| <i>O. rhizomatis</i> | IRRI | Murukkuwataw ana    | 103410 | 2/26/1979 | 8.083333 | 80      |
| <i>O. rhizomatis</i> | IRRI | Thamarakkulam a     | 103414 | 2/26/1979 | 7.75     | 79.9167 |
| <i>O. rhizomatis</i> | IRRI | Echchankulam        | 103417 | 2/26/1979 | 8.833333 | 80.4167 |
| <i>O. rhizomatis</i> | IRRI | Murukkuwataw ana    | 103421 | 2/26/1979 | 8.916667 | 81      |
| <i>O. rhizomatis</i> | IRRI | Elalla              | 104609 | 3/5/1984  | 6.333333 | 81.0833 |
| <i>O. rhizomatis</i> | IRRI | -                   | 105429 | 2/14/1988 | 6.166667 | 81.5    |
| <i>O. rhizomatis</i> | IRRI | -                   | 105432 | 2/14/1988 | 6.166667 | 81.5    |
| <i>O. rhizomatis</i> | IRRI | -                   | 105440 | 2/14/1988 | 6.166667 | 81.5    |
| <i>O. rhizomatis</i> | IRRI | -                   | 105443 | 2/14/1988 | 6.166667 | 81.5    |
| <i>O. rhizomatis</i> | IRRI | -                   | 105445 | 2/14/1988 | 6.166667 | 81.5    |
| <i>O. rhizomatis</i> | IRRI | -                   | 105446 | 2/14/1988 | 6.166667 | 81.5    |
| <i>O. rhizomatis</i> | IRRI | Patanagala Point    | 105447 | 2/14/1988 | 6.333333 | 81.5    |
| <i>O. rhizomatis</i> | IRRI | Patanagala Point    | 105448 | 2/14/1988 | 6.333333 | 81.5    |
| <i>O. rhizomatis</i> | IRRI | Kirinda             | 105449 | 2/14/1988 | 6.5      | 81.5    |



|                      |      |                              |        |           |          |         |
|----------------------|------|------------------------------|--------|-----------|----------|---------|
| <i>O. rhizomatis</i> | IRRI | Kirinda                      | 105450 | 2/14/1988 | 6.5      | 81.5    |
| <i>O. rhizomatis</i> | IRRI | Katupathwewa                 | 105659 | 2/14/1988 | 8.25     | 80.0833 |
| <i>O. rhizomatis</i> | IRRI | -                            | 105660 | 2/14/1988 | 6.166667 | 81.5    |
| <i>O. rhizomatis</i> | IRRI | -                            | 105949 | 2/14/1988 | 6.166667 | 81.5    |
| <i>O. rhizomatis</i> | IRRI | -                            | 105950 | 2/14/1988 | 6.166667 | 81.5    |
| <i>O. rufipogon</i>  | IRRI | Kandalama Reservoir          | 99526  | 2/14/1993 | 7.876944 | 80.7    |
| <i>O. rufipogon</i>  | IRRI | Nabadawewa                   | 104599 | 3/5/1984  | 7.666667 | 80.1667 |
| <i>O. rufipogon</i>  | IRRI | -                            | 104602 | 3/5/1984  | 7.5      | 79.8333 |
| <i>O. rufipogon</i>  | IRRI | Wendesiwatta 1st Ln, Wattala | 104605 | 3/5/1984  | 7        | 79.9167 |
| <i>O. rufipogon</i>  | IRRI | Paragasthota                 | 105420 | 2/14/1988 | 6.666667 | 80      |
| <i>O. rufipogon</i>  | IRRI | Paragasthota                 | 105422 | 2/14/1988 | 6.666667 | 80      |
| <i>O. rufipogon</i>  | IRRI | Munhena                      | 105424 | 2/14/1988 | 6.5      | 80      |
| <i>O. rufipogon</i>  | IRRI | Akurugoda South              | 105425 | 2/14/1988 | 6        | 80.5    |
| <i>O. rufipogon</i>  | IRRI | Akurugoda South              | 105426 | 2/14/1988 | 6        | 80.5    |
| <i>O. rufipogon</i>  | IRRI | -                            | 105461 | 2/14/1988 | 7        | 80      |
| <i>O. rufipogon</i>  | IRRI | -                            | 105463 | 2/14/1988 | 7        | 80      |
